# Supplementary material for: Surface plasmon resonance enhancement of photoluminescence intensity and bioimaging application of gold nanorod@CdSe/ZnS quantum dots
Source: publisher site journal article supplement (doi:10.3762/bjnano.10.3), 2019-01-03
Supplement: Additional file 1 [file 2190-4286-10-3-S1.pdf]

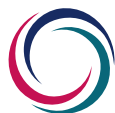

## Supporting Information

for

### **Surface plasmon resonance enhancement of photoluminescence intensity and bioimaging application of gold nanorod@CdSe/ZnS quantum dots**

Siyi Hu, Yu Ren, Yue Wang, Jinhua Li, Junle Qu, Liwei Liu, Hanbin Ma and Yuguo Tang

*Beilstein J. Nanotechnol.* **2019**, *10*, 22–31. [doi:10.3762/bjnano.10.3](https://doi.org/10.3762/bjnano.10.3)

### **Relative cell viability of MCF-7 breast cancer cells treated with different concentrations (6.25–100 µg/mL) of GNR@CdSe/ZnS for 24 h. TEM image of CdSe/ZnS QDs**

Cell viability studies were performed by using the MTT assay method. Briefly, the cells we applied are MCF-7 breast cancer cells. Firstly, we seeded cells into a 96-well plate with cell density of 50% for 24 h at 37 °C with 5% CO<sub>2</sub>. Secondly, we added different concentrations of GNRs@CdSe/ZnS nanoparticles (6.25–100 µg/mL) in the cells, then incubated for another 24 h at 37 °C with 5% CO<sub>2</sub>. Thirdly, 18 µL of MTT (5 mg/mL) solution was added to each well, then the cells were incubated for another 4 h at 37 °C with 5% CO<sub>2</sub>. Fourthly, 150 µL of dimethyl sulfoxide (DMSO, Sigma) was added into the each wells. The absorbance of the samples at 490 nm were measured using microplate reader (Infinite M200 PRO, Tecan). The cell viability was obtained by normalizing the absorbance of the sample wells against that of the control wells.

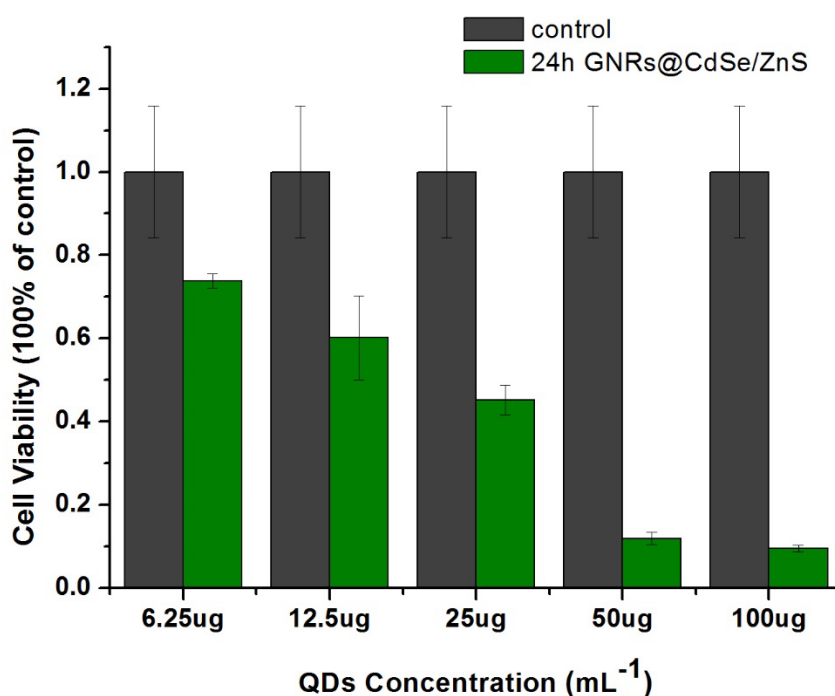

**Figure S1:** Relative cell viability of MCF-7 breast cancer cell treated with different concentrations (6.25–100 µg/mL) of GNRs@CdSe/ZnS for 24 h.

The average size of the CdSe/ZnS QDs is  $8 \pm 1$  nm, the TEM image of QDs as shown in below.

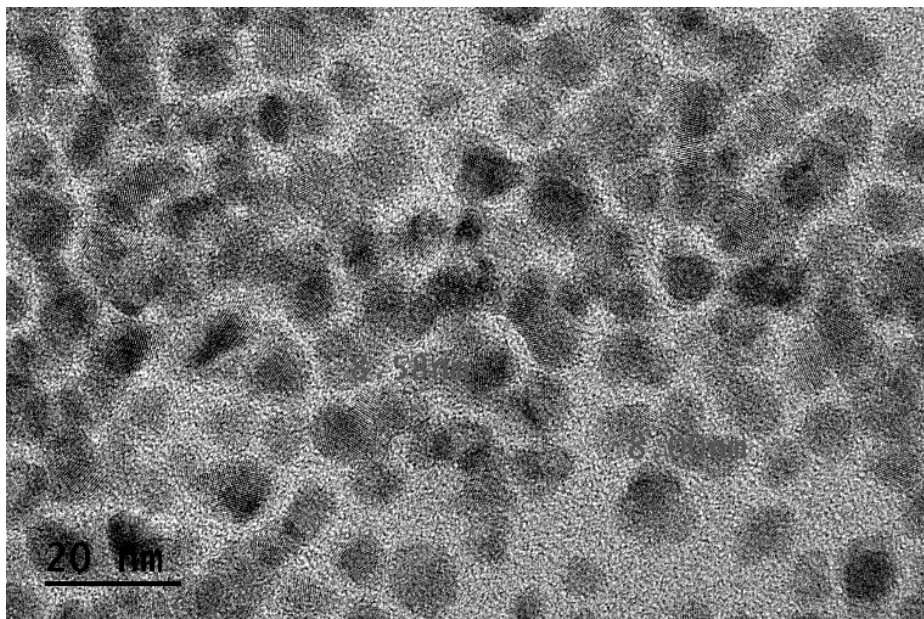

**Figure S2:** TEM image of CdSe/ZnS QDs.
